# Supplementary material for: Distinct Resistomes and Microbial Communities of Soils, Wastewater Treatment Plants and Households Suggest Development of Antibiotic Resistances Due to Distinct Environmental Conditions in Each Environment
Source: MDPI journal article supplement (doi:10.3390/antibiotics10050514), 2021-05-01
Supplement: s1 [file s1]

## Supplementary data

### Reads assigned to antibiotic resistance factors

**Table S1:** Percentage and number of reads of virulence factor annotated to ABR factors.

| sample    | percentage of ABR factors | number of reads |
|-----------|---------------------------|-----------------|
| <b>S1</b> | 3.2%                      | 20              |
| <b>S2</b> | 3.1%                      | 18              |
| <b>S3</b> | 3.4%                      | 18              |
| <b>WW</b> | 40.7%                     | 8132            |
| <b>SS</b> | 44.1%                     | 1150            |
| <b>EF</b> | 38.4%                     | 584             |
| <b>SD</b> | 28.2%                     | 6002            |
| <b>DW</b> | 14.6%                     | 6532            |
| <b>WM</b> | 27.1%                     | 4971            |

### Acquired antibiotic resistance genes (Resfinder)

**Table S2:** Acquired antibiotic resistance genes with accession number identified via Resfinder in Wastewater (WW) samples.

| WW1         | Accession no. | WW3         | Accession no. | WW4         | Accession no. | WW5         | Accession no. |
|-------------|---------------|-------------|---------------|-------------|---------------|-------------|---------------|
| aadA10      | U37105        | aadA11      | AY144590      | aadA11      | AY144590      | aadA11      | AJ567827      |
| aadA11      | AJ567827      | aadA13      | AY713504      | aadA13      | AY713504      | aadA11      | AY144590      |
| aadA11      | AY144590      | aadA2       | NC_010870     | aadA5       | AF137361      | aadA13      | AY713504      |
| aadA16      | EU675686      | aadA5       | AF137361      | ant(3'')-Ia | X02340        | aadA16      | EU675686      |
| aaDA5       | AF137361      | aadA6       | AF140629      | aph(3'')-Ib | AF024602      | aadA5       | AF137361      |
| aadA6       | AF140629      | ant(3'')-Ia | X02340        | aph(3'')-Ia | V00359        | ant(2'')-Ia | X04555        |
| ant(3'')-Ia | X02340        | aph(3'')-Ib | AF024602      | aph(6)-Id   | M28829        | ant(3'')-Ia | 02340         |
| ant(6)-Ia   | KF421157      | aph(6)-Id   | M28829        | blaAER-1    | U14748        | ant(6)-Ia   | KF421157      |
| ant(6)-Ia   | KF864551      | blaAER-1    | U14748        | blaCARB-10  | EU850412      | ant(6)-Ia   | KF864551      |
| aph(3'')-Ib | AF024602      | blaGES-5    | DQ236171      | blaGES-5    | DQ236171      | aph(3'')-Ib | AF024602      |
| aph(6)-Id   | M28829        | blaNPS      | AY027589      | blaLCR-1    | X56809        | aph(3'')-Ib | AF321551      |
| blaAER-1    | U14748        | blaOXA-10   | J03427        | blaOXA-1    | HQ170510      | aph(6)-Id   | M28829        |
| blaLCR-1    | X56809        | blaOXA-119  | DQ767903      | blaOXA-10   | J3427         | blaAER-1    | U14748        |
| blaNPS      | AY027589      | blaOXA-2    | DQ112222      | blaOXA-119  | DQ767903      | blaBEL-1    | DQ089809      |
| blaOXA-10   | J03427        | blaOXA-20   | AF024602      | blaOXA-129  | FJWZ01000025  | blaCARB-10  | EU850412      |

|             |              |               |              |               |              |            |              |
|-------------|--------------|---------------|--------------|---------------|--------------|------------|--------------|
| blaOXA-101  | AM412777     | blaOXA-205    | JF800667     | blaOXA-2      | DQ112222     | blaGES-5   | DQ236171     |
| blaOXA-119  | DQ767903     | blaOXA-347    | ACWG01000053 | blaOXA-205    | JF800667     | blaLCR-1   | X56809       |
| blaOXA-129  | FJWZ01000025 | blaOXA-392    | AB901044     | blaOXA-211    | JN861779     | blaNPS     | AY027589     |
| blaOXA-2    | DQ112222     | blaOXA-427    | KX827604     | blaOXA-296    | APOH01000009 | blaOXA-10  | J03427       |
| blaOXA-205  | JF800667     | blaVEB-1      | HM370393     | blaOXA-333    | KF203107     | blaOXA-101 | AM412777     |
| blaOXA-211  | JN861779     | cfxA3         | AF472622     | blaOXA-347    | ACWG01000053 | blaOXA-119 | DQ767903     |
| blaOXA-296  | APOH01000009 | mcr-3.6       | MF598076     | blaOXA-392    | AB901044     | blaOXA-129 | FJWZ01000025 |
| blaOXA-347  | ACWG01000053 | ere(D)        | KP265721     | blaOXA-427    | KX827604     | blaOXA-2   | DQ112222     |
| blaOXA-392  | AB901044     | erm(B)        | U86375       | blaVEB-1      | DQ393569     | blaOXA-20  | AF024602     |
| blaOXA-4    | AY162283     | erm(F)        | M17808       | cfxA3         | AF472622     | blaOXA-205 | JF800667     |
| blaOXA-427  | KX827604     | lnu(B)        | JQ861959     | cfxA6         | GQ342996     | blaOXA-211 | JN861779     |
| blaOXA-58 A | Y665723      | lnu(C)        | AY928180     | ere(D)        | KP265721     | blaOXA-296 | APOH01000009 |
| blaVEB-1    | HM370393     | lnu(F)        | EU118119     | erm(B)        | U86375       | blaOXA-333 | KF203107     |
| cfxA3       | AF472622     | lsa(E)        | JX560992     | erm(F)        | M17808       | blaOXA-347 | ACWG01000053 |
| mcr-5.1     | KY807921     | mef(A)        | AF227520     | lnu(B)        | JQ861959     | blaOXA-35  | AF315786     |
| ere(A)      | AF099140     | mef(A)        | AJ971089     | lnu(C)        | AY928180     | blaOXA-392 | AB901044     |
| ere(A)      | DQ157752     | mef(A)        | HG423652     | lnu(F)        | EU118119     | blaOXA-4   | AY162283     |
| ere(D)      | KP265721     | mef©          | AB571865     | lnu(G)        | KX470419     | blaOXA-427 | KX827604     |
| erm(47)     | KU612222     | mph(A)        | D16251       | lsa(E)        | JX560992     | blaOXA-58  | AY665723     |
| erm(B)      | U86375       | mph E         | DQ839391     | mef(A)        | HG423652     | blaVEB-1   | HM370393     |
| erm(F)      | M17808       | mph(G)        | AB571865     | mef(A)        | U83667       | cfxA5      | AY769934     |
| lnu(B)      | JQ861959     | msr(D)        | AF227520     | mef(B)        | FJ196385     | ere(A)     | AF099140     |
| lnu(F)      | AJ561197     | msr(E)        | FR751518     | mef(C)        | AB571865     | ere(D)     | KP265721     |
| lnu(F)      | EU118119     | aac(6')-Ib-cr | DQ303918     | mph(A)        | D16251       | erm(47)    | KU612222     |
| lsa(E)      | JX560992     | qnrS2         | DQ485530     | mph(E)        | DQ839391     | erm(B)     | U86375       |
| mef(A)      | AF227520     | sul1          | U12338       | mph(G)        | AB571865     | erm(F)     | M17808       |
| mef(A)      | HG423652     | sul2          | AY034138     | mph(N)        | KF648874     | lnu(B)     | JQ861959     |
| mef(B)      | FJ196385     | tet(39)       | KT346360     | msr(D)        | AF227520     | lnu(C)     | AY928180     |
| mef©        | AB571865     | tet(A)        | AF534183     | msr(D)        | AF274302     | lnu(F)     | EU118119     |
| mph(E)      | DQ839391     | tet(C)        | AF055345     | msr(E)        | FR751518     | lnu(G)     | KX470419     |
| mph(G)      | AB571865     | tet(E)        | CP000645     | aac(6')-Ib-cr | DQ303918     | lsa(E)     | JX560992     |
| msr(D)      | AF227520     | tet(Q)        | L33696       | qnrS2         | DQ485530     | mef(A)     | AF227520     |
| msr(D)      | AF274302     | tet(Q)        | X58717       | qnrVC4        | GQ891757     | mef(A)     | AJ971089     |
| msr(E)      | FR751518     | tet(W)        | AJ427422     | sul1          | U12338       | mef(A)     | HG423652     |
| catB3       | U13880       | dfrA14        | KF921535     | sul2          | AY034138     | mef(B)     | FJ196385     |

|               |          |         |          |               |          |
|---------------|----------|---------|----------|---------------|----------|
| cmlA1         | M64556   | tet(39) | KT346360 | mef(C)        | AB571865 |
| cmx           | U85507   | tet(A)  | AJ517790 | mph(A)        | D16251   |
| aac(6')-Ib-cr | DQ303918 | tet(C)  | AY046276 | mph(E)        | DQ839391 |
| qnrS2         | DQ485530 | tet(E)  | CP000645 | mph(G)        | AB571865 |
| sul1          | AY963803 | tet(M)  | X04388   | msr(D)        | AF227520 |
| sul2          | AY034138 | tet(Q)  | L33696   | msr(D)        | AF274302 |
| tet(36)       | AJ514254 | tet(Q)  | X58717   | msr(E)        | FR751518 |
| tet(39)       | KT346360 | tet(W)  | AJ427422 | catB3         | U13880   |
| tet(A)        | AJ517790 | tet(X)  | M37699   | catQ          | M55620   |
| tet(C)        | AY046276 | dfrA12  | AM040708 | cmlA1         | M64556   |
| tet(E)        | CP000645 | dfrA14  | DQ388123 | cmx           | U85507   |
| tet(M)        | X04388   |         |          | aac(6')-Ib-cr | DQ303918 |
| tet(Q)        | L33696   |         |          | qnrS2         | DQ485530 |
| tet(W)        | AJ427422 |         |          | qnrVC4        | GQ891757 |
| dfrA14        | KF921535 |         |          | sul1          | AY963803 |
|               |          |         |          | sul2          | AY034138 |
|               |          |         |          | tet(39)       | KT346360 |
|               |          |         |          | tet(40)       | FJ158002 |
|               |          |         |          | tet(A)        | AF534183 |
|               |          |         |          | tet(C)        | AF055345 |
|               |          |         |          | tet(E)        | CP000645 |
|               |          |         |          | tet(M)        | X04388   |
|               |          |         |          | tet(O/32/O)   | FP929050 |
|               |          |         |          | )             |          |
|               |          |         |          | tet(Q)        | L33696   |
|               |          |         |          | tet(Q)        | X58717   |
|               |          |         |          | tet(Q)        | Z21523   |
|               |          |         |          | tet(W)        | AJ427422 |
|               |          |         |          | tet(X)        | M37699   |

**Table S3:** Acquired antibiotic resistance genes with accession number identified via Resfinder in sewage sludge (SS) samples.

| SS1        | Accession no. | SS2      | Accession no. | SS3    | Accession no. |
|------------|---------------|----------|---------------|--------|---------------|
| ant(6)-Ia  | KF421157      | aadA11   | AJ567827      | aadA2  | NC_010870     |
| blaOXA-296 | APOH01000009  | ant(6)-I | FN594949      | mph(A) | U36578        |
| blaOXA-5   | AF347074      | erm(47)  | KU612222      | sul1   | AY963803      |
| erm(B)     | U86375        | erm(B)   | X66468        |        |               |
| lnu(B)     | JQ861959      | lsa(E)   | JX560992      |        |               |
| lsa(E)     | JX560992      | mef(A)   | HG423652      |        |               |
| mef(A)     | HG423652      | mef(B)   | FJ196385      |        |               |
| mph(E)     | DQ839391      | msr(D)   | AF227520      |        |               |
| mph(N)     | KF648874      | msr(D)   | AF274302      |        |               |
| msr(D)     | AF227520      | msr(E)   | FR751518      |        |               |
| msr(D)     | AF274302      | sul1     | AY963803      |        |               |
| msr(E)     | FR751518      | sul2     | AY034138      |        |               |

|        |          |        |          |
|--------|----------|--------|----------|
| tet(M) | AM990992 | catQ   | M55620   |
| sul1   | AY963803 | tet(W) | AJ427422 |
| catQ   | M55620   |        |          |

  

| SS4        | Accession no. | SS5       | Accession no. |
|------------|---------------|-----------|---------------|
| blaOXA-10  | J03427        | aph(6)-Id | M28829        |
| blaOXA-129 | FJWZ0100002   | blaOXA-5  | AF347074      |
|            | 5             |           |               |
| lnu(B)     | JQ861959      | erm(47)   | KU612222      |
| sul1       | AY963803      | erm(B)    | U86375        |
|            |               | erm(F)    | M17808        |
|            |               | lnu(B)    | JQ861959      |
|            |               | lsaE      | JX560992      |
|            |               | mef(A)    | HG423652      |
|            |               | mph(E)    | DQ839391      |
|            |               | msr(D)    | AF227520      |
|            |               | msr(D)    | AF274302      |
|            |               | msr(E)    | FR751518      |
|            |               | sul1      | AY963803      |
|            |               | sul2      | AY034138      |
|            |               | EstDL136  | JN242251      |
|            |               | catQ      | M55620        |

**Table S4:** Acquired antibiotic resistance genes with accession number identified via Resfinder in WWTP effluent (EF) and soil (2A and 3C) samples.

| EF1  | Accession no. | EF3         | Accession no. | S2-1  | Accession no. |
|------|---------------|-------------|---------------|-------|---------------|
| sul1 | AY963803      | aph(3'')-Ib | AF024602      | dfrB3 | FM877478      |
|      |               | erm(B)      | AF299292      |       |               |
|      |               | sul1        | U12338        |       |               |
|      |               | cmx         | U85507        |       |               |

  

| EF4    | Accession no. | EF5       | Accession no. | S3-3  | Accession no. |
|--------|---------------|-----------|---------------|-------|---------------|
| aadA11 | AJ567827      | blaOXA-20 | AF024602      | dfrB3 | X72585        |
| sul1   | U12338        | sul2      | AY034138      |       |               |

**Table S5:** Acquired antibiotic resistance genes with accession number identified via Resfinder in dishwasher (DW), shower drain (SD) and washing machine (W) samples.

| DW          | Accession no. | SD          | Accession no. | WM1-4       | Accession no. |
|-------------|---------------|-------------|---------------|-------------|---------------|
| aac(6')-Iih | AJ584701      | aph(3'')-Ib | AF024602      | aac(3)-Ich  | CP000490      |
| aac(6')-Iz  | AF140221      | aph(3')-IIb | CP006832      | aadA10      | U37105        |
| aph(3')-Iic | AM743169      | aph(6)-Id   | M28829        | aadA11      | AY144590      |
| blaACT-14   | JX440354      | blaCMY-49   | GQ402541      | aph(3'')-Ib | AF321551      |
| blaADC-25   | EF016355      | blaOXA-50   | AY306130      | aph(6)-Id   | M28829        |
| blaEBR-1    | AF416700      | fosA        | ACWU010001    | blaACT-12   | JX440355      |
|             |               | 46          |               |             |               |
| blaOCH-2    | AJ295340      | catB7       | AF036933      | blaCMY-25   | EU515249      |

|            |          |       |          |             |              |
|------------|----------|-------|----------|-------------|--------------|
| blaOCH-7   | AJ295345 | crpP  | HM560971 | blaOCH-7    | AJ295345     |
| blaOXA-258 | HE614014 | qnrB1 | DQ351241 | blaOXA-373  | HG931732     |
| blaOXA-417 | KM220587 |       |          | blaSHV-187  | LN515533     |
| blaOXY-5-1 | AJ871868 |       |          | blaSHV-75   | AM176550     |
| fosA       | M85195   |       |          | fosA        | ACWO01000079 |
| mdf(A)     | Y08743   |       |          | oqxA        | EU370913     |
| tet(42)    | EU523697 |       |          | oqxB        | EU370913     |
|            |          |       |          | sul1        | AY963803     |
|            |          |       |          | sul2        | AY034138     |
|            |          |       |          | aadA10      | U37105       |
|            |          |       |          | ant(3'')-Ia | X02340       |
|            |          |       |          | aph(3'')-Ib | AF024602     |
|            |          |       |          | aph(3')-Iic | AM743169     |
|            |          |       |          | aph(6)-Id   | M28829       |
|            |          |       |          | blaHERA-1   | AF311385     |
|            |          |       |          | blaOCH-4    | AJ295342     |
|            |          |       |          | blaOXA-114c | HM056041     |
|            |          |       |          | blaOXA-373  | HG931732     |
|            |          |       |          | catA1       | V00622       |
|            |          |       |          | crpP        | HM560971     |
|            |          |       |          | cat(pC194)  | NC_002013    |
|            |          |       |          | catB7       | AF036933     |
|            |          |       |          | fosA        | ACWU01000146 |
|            |          |       |          | aadA10      | U37105       |
|            |          |       |          | aph(3')-Iib | CP006832     |
|            |          |       |          | aph(6)-Id   | M28829       |
|            |          |       |          | blaOXA-114c | HM056041     |
|            |          |       |          | blaOXA-134  | HQ122933     |
|            |          |       |          | blaOXA-212  | JN861780     |
|            |          |       |          | blaOXA-282  | APQS01000019 |
|            |          |       |          | blaOXA-283  | AYHO01000005 |
|            |          |       |          | blaOXA-333  | KF203107     |
|            |          |       |          | blaOXA-488  | CP017969     |
|            |          |       |          | blaPAO      | AY083592     |
|            |          |       |          | aadA6       | AF140629     |
|            |          |       |          | aph(3'')-Ib | AF024602     |
|            |          |       |          | aph(3')-Iib | CP006832     |
|            |          |       |          | aph(6)-Id   | M28829       |
|            |          |       |          | blaOCH-5    | AJ295343     |
|            |          |       |          | blaOCH-6    | AJ295344     |
|            |          |       |          | blaOCH-7    | AJ295345     |
|            |          |       |          | blaOXA-114c | HM056041     |
|            |          |       |          | blaOXA-212  | JN861780     |
|            |          |       |          | blaOXA-396  | AY306134     |
|            |          |       |          | blaPAO      | FJ666073     |
|            |          |       |          | crpP        | HM560971     |

|      |          |
|------|----------|
|      | U12338   |
| sul1 | AY034138 |
| sul2 |          |

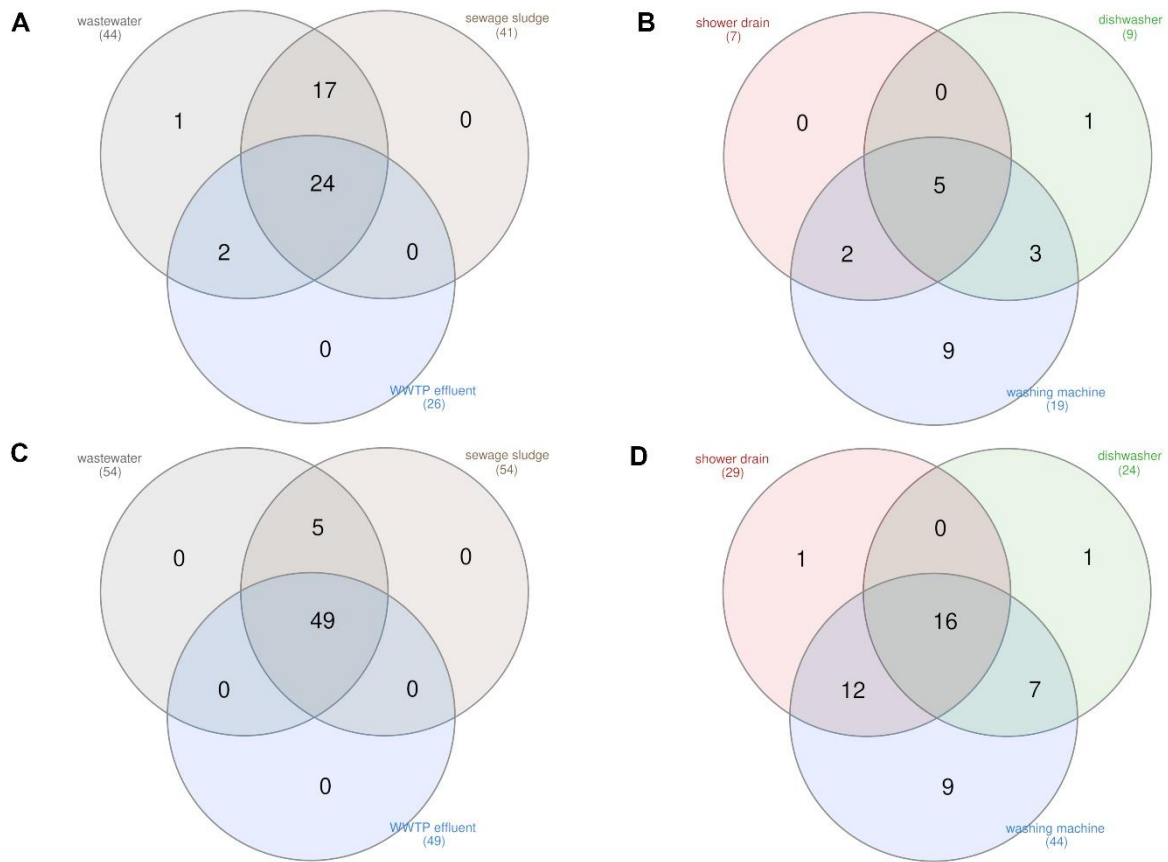

**Figure S1:** Venn diagram of antibiotic resistance genes and mobile genetic elements in WWTP (A, C) and household samples (B, D) annotated using MvirDB. The number in the bracket indicates the total number of genes annotated for each sample type.

## Sequencing reads

**Table S6:** Sequence reads per samples of soil (S1, S2, S3), WWTP (WW, SS, EF) and household samples (SD, DW, WM).

| sample      | total reads | high quality reads | sample     | total reads | high quality reads |
|-------------|-------------|--------------------|------------|-------------|--------------------|
| <b>S1.1</b> | 30,155,842  | 29,392,172         | <b>SS1</b> | 27,841,748  | 27,184,980         |
| <b>S1.2</b> | 30,252,856  | 29,487,760         | <b>SS2</b> | 29,552,232  | 28,842,838         |
| <b>S1.3</b> | 33,207,516  | 32,049,660         | <b>SS3</b> | 23,844,194  | 23,306,058         |
| <b>S1.4</b> | 27,088,328  | 26,289,070         | <b>SS4</b> | 28,851,940  | 28,162,328         |
| <b>S2.1</b> | 27,874,140  | 27,145,314         | <b>SS5</b> | 45,557,500  | 44,544,338         |
| <b>S2.2</b> | 22,138,400  | 21,476,644         | <b>EF1</b> | 29,956,520  | 29,260,546         |

|             |            |            |            |            |            |
|-------------|------------|------------|------------|------------|------------|
| <b>S2.3</b> | 36,275,070 | 35,326,374 | <b>EF3</b> | 27,685,258 | 27,026,562 |
| <b>S2.4</b> | 26,881,178 | 26,241,796 | <b>EF4</b> | 29,199,610 | 28,493,828 |
| <b>S3.1</b> | 25,784,402 | 25,198,700 | <b>EF5</b> | 30,428,190 | 29,768,104 |
| <b>S3.2</b> | 28,240,628 | 27,420,090 | <b>SD5</b> | 31,657,982 | 30,737,836 |
| <b>S3.3</b> | 25,678,742 | 24,967,918 | <b>DW</b>  | 24,271,104 | 23,617,480 |
| <b>S3.4</b> | 22,515,406 | 21,833,202 | <b>WM2</b> | 32,182,966 | 31,423,310 |
| <b>WW1</b>  | 31,810,164 | 30,987,066 | <b>WM3</b> | 25,906,062 | 25,300,232 |
| <b>WW3</b>  | 25,286,020 | 24,730,394 | <b>WM4</b> | 27,960,538 | 27,110,180 |
| <b>WW3</b>  | 23,253,200 | 22,800,878 | <b>WM5</b> | 29,590,952 | 28,754,122 |
| <b>WW5</b>  | 32,467,628 | 31,713,750 |            |            |            |

## Taxonomic distribution

**Table S7:** Percentage of reads assigned to kingdoms in different soils (S1, S2, S3), wastewater (WW), sewage sludge (SS), effluent (EF), shower drains (SD), dishwashers (DW) and washing machines (WM) in percent.

|                  | <b>S1</b> | <b>S2</b> | <b>S3</b> | <b>WW</b> | <b>SS</b> | <b>EF</b> | <b>SD</b> | <b>DW</b> | <b>WM</b> |
|------------------|-----------|-----------|-----------|-----------|-----------|-----------|-----------|-----------|-----------|
| <b>Archaea</b>   | 0.4       | 0.5       | 0.4       | 0.2       | 0.3       | 0.1       | 0.0       | 0.0       | 0.0       |
| <b>Bacteria</b>  | 97.4      | 97.3      | 97.4      | 99.3      | 98.1      | 96.5      | 99.6      | 97.7      | 99.5      |
| <b>Eukaryota</b> | 0.5       | 0.5       | 0.5       | 0.1       | 0.4       | 1.6       | 0.1       | 0.0       | 0.1       |
| <b>Fungi</b>     | 0.5       | 0.4       | 0.5       | 0.1       | 0.3       | 0.6       | 0.1       | 1.9       | 0.1       |
| <b>Viruses</b>   | 0.0       | 0.0       | 0.0       | 0.1       | 0.0       | 0.1       | 0.0       | 0.1       | 0.1       |
| <b>Ambiguous</b> | 1.2       | 1.3       | 1.2       | 0.3       | 0.9       | 1.2       | 0.2       | 0.3       | 0.2       |
